# Supplementary material for: Rate-of-change analysis in palaeoecology revisited: a new approach
Source: bioRxiv or medRxiv preprint supplement (doi:10.1101/2020.12.16.422943), 2021-06-24
Supplement: Supplementary file [file media-1.pdf]

1 Running headline: ROC in palaeoecology revisited

2 **SUPPLEMENTARY: Rate-of-change analysis in palaeoecology**  
3 **revisited: a new approach**

4 Ondřej Mottl<sup>1</sup>, John-Arvid Grytnes<sup>1</sup>, Alistair W.R. Seddon<sup>2</sup>, Manuel J. Steinbauer<sup>1,3</sup>, Kuber P. Bhatta<sup>1</sup>,  
5 Vivian A. Felde<sup>2</sup>, Suzette G.A. Flantua<sup>1</sup>, H. John B. Birks<sup>2,4</sup>

6 1. Department of Biological Sciences, University of Bergen, PO Box 7803, N-5020 Bergen, Norway

7 2. Department of Biological Sciences and Bjerknes Centre for Climate Research, University of  
8 Bergen, PO Box 7803, N-5020 Bergen, Norway

9 3. Bayreuth Center of Ecology and Environmental Research (BayCEER) and Department of Sport  
10 Science, University of Bayreuth, 95547 Bayreuth, Germany

11 4. Environmental Change Research Centre, University College London, Gower Street, London,  
12 WC1 6BT, UK.

13

14 **Correspondence author:**

15 Ondřej Mottl (ORCID number 0000-0002-9796-5081)

16 **Email:** [ondrej.mottl@gmail.com](mailto:ondrej.mottl@gmail.com)

17 **Address:** Department of Biological Sciences, University of Bergen, PO Box 7803, N-5020 Bergen,  
18 Norway

19 SUPPLEMENTARY

20 Supplementary Methods

21 Detailed description of R-Ratepol:

22 Randomisation

23 Due to the inherent statistical errors in a pollen count in each level (Birks & Gordon, 1985) and  
24 uncertainties in the age estimates for each level from age-depth modelling, R-Ratepol is run several  
25 times and the results summarised. For each run, one age prediction is randomly selected from the  
26 pool of age predictions, and pollen taxa are standardised to a certain number of pollen grains in each  
27 working unit (WU) by rarefaction (using random sampling without replacement to a default of 150  
28 pollen grains). The calculation between two consecutive WUs (i.e. one working-unit combination)  
29 results in a **RoC score** and a **time position** (calculated as the mean age position of the WUs). However,  
30 due to random sampling of the age sequence, each WU combination will result in multiple RoC values  
31 and age positions. R-Ratepol assigns the age position of each WU combination as the median time  
32 position from all calculations. The final RoC values are calculated as the median and 95<sup>th</sup> quantile of  
33 the scores from all calculations. In addition, because of excluding empty bins in the selective binning  
34 with a moving window approach, it is possible that some WU combinations will not be present in some  
35 calculations. Therefore, R-Ratepol only includes WU combinations that are present in at least 10% of  
36 all calculations.

37 Description of individual steps:

38 1) Pollen-data smoothing

39 Each pollen taxon is smoothed by one of five smoothing functions in R-Ratepol.

40 A) None: Pollen data are not smoothed

41 B) Moving average (Wilkinson, 2005): Each focus value is calculated as the average over  $N$   
42 number of levels (preferably  $\frac{1}{2} N$  before and  $\frac{1}{2}$  after the focus level; values are adjusted at the  
43 beginning and end of the core.  $N$  must be odd number). Note that each calculation is done  
44 from scratch and results are saved separately in order to avoid cumulative rounding errors.  
45 Default  $N$  is set to 5.

46 C) Grimm's smoothing (Grimm & Jacobson, 1992): Similar to a moving average but  $N$  is not fixed.  
47 For each level,  $N$  is selected as an odd number between  $N_a$  and  $N_b$  ( $N \in \{N_a, N_b\}$ ) while  
48 maintaining the maximum age difference from the selected levels as  $Age_{MAX}$ . Default values  
49 are set as  $N_a = 5$ ,  $N_b = 9$ ,  $Age_{MAX} = 500$ .

50 D) Age-weighted average (Wilkinson, 2005): Similar to the moving average above but the average  
51 is weighted by the age difference from the focus level and multiplied by  $\frac{1}{CONSTANT}$

52 (CONSTANT is selected by the user). To avoid up-weighting levels, if  $\frac{\text{CONSTANT}}{\text{AGEDIFF}}$  exceeds 1, it  
53 is treated as 1. This means that levels closer than the CONSTANT to the target age are given  
54 full weight, but those farther away are downweighted by an amount increasing with age  
55 difference. CONSTANT has a default setting of 500 years.

56 E) Shepard's 5-term filter (Davis, 1986; Wilkinson, 2005): Smoothing over 5 points following the  
57 equation below

$$58 \quad V_{NEW} = \frac{17*V + 12*(V_{(+1)} + V_{(-1)}) - 3*(V_{(+2)} + V_{(-2)})}{35},$$

59 where V is the focal level value. All result values smaller than zero are treated as zero.

60 2) Creation of template for all time bins in all window movement

61 Bins of selected size are created, starting from zero. This is repeated many times, with each time bin  
62 (window) shifting by Z years forward. This is repeated X times, where X = bin size / Z.

63 3a) Random-time sequence sampling from the age-depth model

64 One age sequence is randomly selected from the 1000 sequences generated from the *Bchron* age-  
65 depth models. Each of the levels is given one age value and the correct temporal order is checked in  
66 the sequence.

67 3b) Creation of working units (WUs) and data standardisation

68 RoC can be calculated between individual levels or bins. In terms of calculation between levels, each  
69 level becomes one WU. If bins are selected, the level closest to the start of each bin is selected as  
70 representative of that bin. All other levels are excluded. Bins with valid levels become the new WUs,  
71 and empty bins are excluded. Each WU is standardised to the same number of pollen grains (default  
72 value = 150), using random sampling of pollen grains without replacement. The dataset is reduced by  
73 excluding all WUs lacking any pollen, all pollen taxa with no counts.

74 3c) Calculate RoC between adjacent WUs

75 First, the dissimilarity coefficient between adjacent WUs is calculated using one of four dissimilarity  
76 coefficients (Prentice, 1980):

77 A) Euclidean distance:

78  $\sqrt{\sum_{i=1}^m (A_i - B_i)^2}$ , where  $A_i$  and  $B_i$  are relative pollen values (percentages or proportions) for  
79 WUs A and B of taxon  $i$ , and there are  $m$  taxa.

80

81 B) Standardised Euclidean distance:

82  $\sqrt{\sum_{i=1}^m \left(\frac{A_i - B_i}{SD_i}\right)^2}$ , where  $A_i$  and  $B_i$  are relative pollen values for WUs A and B of taxon  $i$ ,  $SD_i$  is

83 the standard deviation for taxon  $i$  calculated from the whole sequence, and there are  $m$  taxa.

84

85 C) Chord distance:

86  $\sqrt{\sum_{i=1}^m (\sqrt{A_i} - \sqrt{B_i})^2}$ , where  $A_i$  and  $B_i$  are relative pollen values for WUs A and B of taxon  $i$ ,  
87 and there are  $m$  taxa.

88

89 D) Chi-squared coefficient:

90  $\sqrt{\sum_{i=1}^m \frac{(A_i - B_i)^2}{(A_i + B_i)}}$ , where  $A_i$  and  $B_i$  are relative pollen values for WUs A and B of taxon  $i$ , and  
91 there are  $m$  taxa.

92

93 Next, the age difference between subsequent WUs is calculated. Finally, the RoC score between WUs  
94 is calculated as:

95  $RoC_{A-B} = \frac{DC_{A-B} * Age.diff_{mean}}{Age.diff_{A-B}}$ , where  $DC_{A-B}$  is the dissimilarity between WUs A and B,  $Age.diff_{mean}$   
96 is the average age difference between WUs in the whole sequence, and  $Age.diff_{A-B}$  is the age  
97 difference between WUs A and B.

98 3d) Summarisation of results from all moving windows

99 Bins (windows) are moved forward by a selected amount of time  $Z$ , the steps 3a–3c are repeated for  
100 a new set of WUs (age sampling, levels selection, RoC calculation). This is repeated  $X$  times, where  
101  $X = \frac{BIN\ size}{Z}$ . Results from all window positions are merged and saved as a single value.

102 4) Step 3 is repeated  $X$  times, with a default number of 10,000 repetitions

103 5) Validation and summary of results from all randomisations

104 Results from all randomisations are merged while keeping the identity of each WU combination. Due  
105 to random selection of the age sequence, each of the WU combinations will result in multiple RoC  
106 values and time positions. The time position of each WU combination is assigned as the median of the  
107 time positions from all randomisations. Final RoC values are calculated as the median score of all  
108 randomisations. In addition, due to excluding empty bins in selective binning with a moving window,  
109 there is a chance that some WU combinations will be present only in some randomisations. Therefore,  
110 only WU combinations that are present in at least 10% of all randomisations are retained.

111 5) Data beyond the selected age are excluded (8000 cal yr BP in this study)

112

113 6) Detection of significant peak-points

114 R-Ratepol detects peak-points using one of three methods:

- 115 1) Threshold method: Each point in the RoC sequence is compared to a median of all RoC scores  
116 from the whole (i.e. *threshold value*). The point is considered significant if the 95<sup>th</sup> quantile of  
117 the RoC scores from all calculations is higher than the *threshold value*.
- 118 2) GAM method: A GAM is fitted through the RoC scores and time positions (GAM =  
119  $\text{RoC} \sim s(\text{time}, k = 3)$ ). The distance between each point and the fitted value is calculated. A  
120 peak-point is considered significant if the distance between the point and the fitted GAM is  
121 greater than 1.5 \* the standard deviation of all differences.
- 122 3) Signal-to-Noise Index (SNI) method: We adapted SNI from Kelly *et al.* (2011) developed to  
123 detect changes in charcoal stratigraphical records. SNI is calculated for the whole RoC  
124 sequence and a peak-point is considered significant if it has an SNI value higher than 3 with  
125 the GAM set as a reference value and with a time window of 500 yrs.

126 [Supplementary Tables and Figures](#)

127 **Table S1. AIC results in terms of successful detection of peak-points comparing different WU**  
 128 **selection methods.** We fitted  $\text{glmmTMB}_{\text{success-method}}$  with the ratio of levels marked as peak-  
 129 points to all levels at the focal area ( $R_{\text{success-method}}$ ) as the dependent variable with a beta-binomial  
 130 error distribution. Independent variables were: WU (3 level factor), Peak-point detection method (3  
 131 level factor), position of environmental change (i.e. density of levels; 2 level factor), richness of dataset  
 132 (2 level factor), and all their interactions. Individual dataset ID was selected as the random factor. We  
 133 used *dredge* to calculate all possible combinations of models and ordered them by AICc. Plus-symbol  
 134 (+) indicates that the predictor is included in the model.

| Richness | Peak | Position | WU | Richness: Peak | Richness: Position | Richness:WU | Peak:Position | Peak:WU | Position:WU | Richness: Peak:Position | Richness: Peak:WU | Richness:Position:WU | Peak:Position:WU | Richness: Peak:Position:WU | df | logLik   | AICc     |
|----------|------|----------|----|----------------|--------------------|-------------|---------------|---------|-------------|-------------------------|-------------------|----------------------|------------------|----------------------------|----|----------|----------|
| +        | +    | +        | +  | +              | +                  | +           | +             | +       | +           | +                       | +                 | +                    | +                |                            | 39 | -20478.7 | 41035.46 |
| +        | +    | +        | +  | +              | +                  | +           | +             | +       | +           | +                       | +                 |                      | +                |                            | 37 | -20483.1 | 41040.21 |
| +        | +    | +        | +  | +              | +                  | +           | +             | +       | +           |                         | +                 | +                    | +                |                            | 37 | -20484.7 | 41043.53 |
| +        | +    | +        | +  | +              | +                  | +           | +             | +       | +           | +                       | +                 | +                    | +                | +                          | 43 | -20478.9 | 41043.93 |
| +        | +    | +        | +  | +              |                    | +           | +             | +       | +           |                         | +                 |                      | +                |                            | 34 | -20488.5 | 41044.98 |
| +        | +    | +        | +  | +              | +                  | +           | +             | +       | +           |                         | +                 |                      | +                |                            | 35 | -20490.4 | 41050.92 |
| +        | +    | +        | +  | +              | +                  | +           | +             | +       | +           | +                       |                   | +                    | +                |                            | 35 | -20496.1 | 41062.26 |
| +        | +    | +        | +  |                | +                  | +           | +             | +       | +           |                         |                   | +                    | +                |                            | 31 | -20500.3 | 41062.55 |
| +        | +    | +        | +  | +              | +                  | +           | +             | +       | +           |                         |                   | +                    | +                |                            | 33 | -20499.9 | 41065.91 |
| +        | +    | +        | +  |                | +                  | +           | +             | +       | +           |                         |                   |                      | +                |                            | 29 | -20508.2 | 41074.35 |
| +        | +    | +        | +  | +              | +                  | +           | +             | +       | +           | +                       |                   |                      | +                |                            | 33 | -20506.3 | 41078.64 |
| +        | +    | +        | +  | +              |                    | +           | +             | +       | +           |                         |                   |                      | +                |                            | 30 | -20509.4 | 41078.86 |
| +        | +    | +        | +  |                |                    | +           | +             | +       | +           |                         |                   |                      | +                |                            | 28 | -20511.7 | 41079.45 |
| +        | +    | +        | +  | +              | +                  | +           | +             | +       | +           |                         |                   |                      | +                |                            | 31 | -20509.1 | 41080.18 |
| +        | +    | +        | +  | +              | +                  |             | +             | +       | +           | +                       |                   |                      | +                |                            | 31 | -20511.7 | 41085.44 |
| +        | +    | +        | +  | +              |                    |             | +             | +       | +           |                         |                   |                      | +                |                            | 28 | -20516.5 | 41088.98 |
| +        | +    | +        | +  |                | +                  |             | +             | +       | +           |                         |                   |                      | +                |                            | 27 | -20518.5 | 41090.96 |
| +        | +    | +        | +  | +              | +                  |             | +             | +       | +           |                         |                   |                      | +                |                            | 29 | -20516.7 | 41091.42 |
| +        | +    | +        | +  |                |                    |             | +             | +       | +           |                         |                   |                      | +                |                            | 26 | -20520.1 | 41092.32 |
|          | +    | +        | +  |                |                    |             | +             | +       | +           |                         |                   |                      | +                |                            | 25 | -20521.9 | 41093.81 |
| +        | +    | +        | +  | +              | +                  | +           | +             | +       | +           | +                       | +                 | +                    |                  |                            | 35 | -20957.3 | 41984.62 |
| +        | +    | +        | +  | +              | +                  | +           | +             | +       | +           |                         | +                 | +                    |                  |                            | 33 | -20960.6 | 41987.32 |
| +        | +    | +        | +  | +              | +                  | +           | +             | +       | +           | +                       | +                 |                      |                  |                            | 33 | -20962.0 | 41990.11 |
| +        | +    | +        | +  | +              |                    | +           | +             | +       | +           |                         | +                 |                      |                  |                            | 30 | -20966.7 | 41993.51 |

|   |   |   |   |   |   |   |   |   |   |   |   |   |   |  |    |          |          |
|---|---|---|---|---|---|---|---|---|---|---|---|---|---|--|----|----------|----------|
| + | + | + | + | + | + | + | + | + | + |   | + |   |   |  | 31 | -20966.7 | 41995.45 |
| + | + | + | + | + | + | + | + | + | + | + |   | + |   |  | 31 | -20973.1 | 42008.29 |
| + | + | + | + |   | + | + | + | + | + |   |   | + |   |  | 27 | -20977.4 | 42008.72 |
| + | + | + | + | + | + | + | + | + | + |   |   | + |   |  | 29 | -20977.4 | 42012.88 |
| + | + | + | + | + | + | + | + | + | + | + |   |   |   |  | 29 | -20982.0 | 42022.09 |
| + | + | + | + |   | + | + | + | + | + |   |   |   |   |  | 25 | -20987.3 | 42024.52 |
| + | + | + | + | + |   | + | + | + | + |   |   |   |   |  | 26 | -20986.5 | 42024.94 |
| + | + | + | + |   |   | + | + | + | + |   |   |   |   |  | 24 | -20989.0 | 42025.97 |
| + | + | + | + | + | + | + | + | + | + |   |   |   |   |  | 27 | -20986.4 | 42026.86 |
| + | + | + | + | + | + |   | + | + | + | + |   |   |   |  | 27 | -20988.5 | 42031.08 |
| + | + | + | + | + |   |   | + | + | + |   |   |   |   |  | 24 | -20994.1 | 42036.26 |
|   | + | + | + |   |   |   | + | + | + |   |   |   |   |  | 21 | -20998.0 | 42038.04 |
| + | + | + | + |   | + |   | + | + | + |   |   |   |   |  | 23 | -20996.0 | 42038.09 |
| + | + | + | + |   |   |   | + | + | + |   |   |   |   |  | 22 | -20997.8 | 42039.58 |
| + | + | + | + | + | + |   | + | + | + |   |   |   |   |  | 25 | -20997.1 | 42044.16 |
| + | + | + | + | + | + | + |   | + | + |   | + | + |   |  | 31 | -21328.4 | 42718.85 |
| + | + | + | + | + |   | + |   | + | + |   | + |   |   |  | 28 | -21337.2 | 42730.39 |
| + | + | + | + | + | + | + |   | + | + |   | + |   |   |  | 29 | -21336.8 | 42731.53 |
| + | + | + | + |   | + | + |   | + | + |   |   | + |   |  | 25 | -21345.7 | 42741.42 |
| + | + | + | + | + | + | + |   | + | + |   |   | + |   |  | 27 | -21347.7 | 42749.38 |
| + | + | + | + |   | + | + |   | + | + |   |   |   |   |  | 23 | -21355.9 | 42757.83 |
| + | + | + | + |   |   | + |   | + | + |   |   |   |   |  | 22 | -21358.0 | 42760.06 |
| + | + | + | + | + | + | + |   | + | + |   |   |   |   |  | 25 | -21355.3 | 42760.53 |
| + | + | + | + | + |   | + |   | + | + |   |   |   |   |  | 24 | -21356.9 | 42761.75 |
| + | + | + | + |   | + |   |   | + | + |   |   |   |   |  | 21 | -21365.1 | 42772.18 |
| + | + | + | + | + |   |   |   | + | + |   |   |   |   |  | 22 | -21364.3 | 42772.57 |
| + | + | + | + | + | + |   |   | + | + |   |   |   |   |  | 23 | -21363.4 | 42772.78 |
| + | + | + | + |   |   |   |   | + | + |   |   |   |   |  | 20 | -21366.9 | 42773.90 |
|   | + | + | + |   |   |   |   | + | + |   |   |   |   |  | 19 | -21368.7 | 42775.50 |
| + | + | + | + | + | + | + | + | + |   | + | + |   |   |  | 31 | -21453.3 | 42968.58 |
| + | + | + | + | + |   | + | + | + |   |   | + |   |   |  | 28 | -21458.0 | 42972.12 |
| + | + | + | + | + | + | + | + | + |   | + | + |   | + |  | 27 | -21459.3 | 42972.64 |
| + | + | + | + | + | + | + | + | + |   |   | + |   |   |  | 29 | -21457.5 | 42973.10 |
| + | + | + | + |   | + | + | + | + | + |   |   | + |   |  | 23 | -21464.0 | 42973.94 |
| + | + | + | + | + | + | + | + | + |   |   |   | + |   |  | 25 | -21463.6 | 42977.28 |
| + | + | + | + | + | + | + | + | + | + | + |   |   |   |  | 25 | -21470.4 | 42990.91 |
| + | + | + | + | + |   | + | + | + | + |   |   |   |   |  | 22 | -21474.3 | 42992.61 |
| + | + | + | + |   | + | + | + | + | + |   |   |   |   |  | 21 | -21475.4 | 42992.84 |
| + | + | + | + | + | + | + | + | + | + |   |   |   |   |  | 23 | -21474.1 | 42994.18 |
| + | + | + | + |   |   | + | + | + | + |   |   |   |   |  | 20 | -21477.7 | 42995.50 |
| + | + | + | + | + | + |   | + | + | + | + |   |   |   |  | 23 | -21475.5 | 42997.04 |
| + | + | + | + | + | + | + | + | + | + | + |   |   |   |  | 27 | -21471.8 | 42997.68 |
| + | + | + | + | + |   |   | + | + | + |   |   |   |   |  | 20 | -21481.6 | 43003.30 |
| + | + | + | + | + |   | + | + | + | + |   |   |   |   |  | 24 | -21477.8 | 43003.66 |

|   |   |   |   |   |   |   |   |   |   |   |  |  |   |  |    |          |          |
|---|---|---|---|---|---|---|---|---|---|---|--|--|---|--|----|----------|----------|
| + | + | + | + |   | + |   | + |   | + |   |  |  |   |  | 19 | -21483.2 | 43004.36 |
| + | + | + | + | + | + | + | + | + |   |   |  |  |   |  | 25 | -21477.2 | 43004.37 |
| + | + | + | + |   | + | + | + | + |   |   |  |  |   |  | 23 | -21479.2 | 43004.41 |
| + | + | + | + | + | + |   | + |   | + |   |  |  |   |  | 21 | -21481.4 | 43004.88 |
| + | + | + | + |   |   |   | + |   | + |   |  |  |   |  | 18 | -21484.6 | 43005.15 |
| + | + | + | + |   |   | + | + | + |   |   |  |  |   |  | 22 | -21480.7 | 43005.47 |
|   | + | + | + |   |   |   | + |   | + |   |  |  |   |  | 17 | -21486.2 | 43006.37 |
| + | + | + | + | + | + |   | + | + |   | + |  |  |   |  | 25 | -21479.9 | 43009.88 |
| + | + | + | + | + |   |   | + | + |   |   |  |  |   |  | 22 | -21485.4 | 43014.91 |
| + | + | + | + |   | + |   | + | + |   |   |  |  |   |  | 21 | -21487.2 | 43016.34 |
| + | + | + | + | + | + |   | + | + |   |   |  |  |   |  | 23 | -21485.5 | 43017.01 |
| + | + | + | + |   |   |   | + | + |   |   |  |  |   |  | 20 | -21488.6 | 43017.14 |
|   | + | + | + |   |   |   | + | + |   |   |  |  |   |  | 19 | -21489.9 | 43017.77 |
| + | + | + | + |   | + | + | + |   |   |   |  |  |   |  | 19 | -21833.8 | 43705.53 |
| + | + | + | + | + | + | + | + |   | + |   |  |  |   |  | 23 | -21831.2 | 43708.49 |
| + | + | + | + | + |   |   | + | + |   |   |  |  |   |  | 20 | -21836.1 | 43712.14 |
| + | + | + | + |   |   |   | + | + |   |   |  |  |   |  | 18 | -21839.1 | 43714.31 |
| + | + | + | + | + | + | + | + |   |   |   |  |  |   |  | 21 | -21836.5 | 43714.97 |
| + | + | + | + | + | + |   | + |   | + |   |  |  |   |  | 21 | -21837.0 | 43716.07 |
| + | + | + | + |   | + | + |   |   | + |   |  |  | + |  | 21 | -21838.6 | 43719.12 |
| + | + | + | + | + | + | + |   |   | + |   |  |  | + |  | 23 | -21837.2 | 43720.35 |
| + | + | + | + |   | + |   | + |   |   |   |  |  |   |  | 17 | -21844.8 | 43723.56 |
| + | + | + | + | + |   |   | + |   |   |   |  |  |   |  | 18 | -21843.9 | 43723.73 |
| + | + | + | + | + | + |   | + |   |   |   |  |  |   |  | 19 | -21842.9 | 43723.81 |
| + | + | + | + |   |   |   | + |   |   |   |  |  |   |  | 16 | -21846.5 | 43725.05 |
|   | + | + | + |   |   |   | + |   |   |   |  |  |   |  | 15 | -21847.5 | 43725.07 |
| + | + | + | + |   | + | + |   |   | + |   |  |  |   |  | 19 | -21849.7 | 43737.37 |
| + | + | + | + |   |   | + |   |   | + |   |  |  |   |  | 18 | -21851.1 | 43738.17 |
| + | + | + | + | + | + | + |   |   | + |   |  |  |   |  | 21 | -21848.2 | 43738.49 |
| + | + | + | + | + |   | + |   |   | + |   |  |  |   |  | 20 | -21849.4 | 43738.89 |
| + | + | + | + | + |   |   |   |   | + |   |  |  |   |  | 18 | -21855.8 | 43747.59 |
| + | + | + | + | + | + |   |   |   | + |   |  |  |   |  | 19 | -21855   | 43747.92 |
| + | + | + | + |   |   |   |   |   | + |   |  |  |   |  | 16 | -21858.2 | 43748.33 |
| + | + | + | + |   | + |   |   |   | + |   |  |  |   |  | 17 | -21857.5 | 43749.08 |
|   | + | + | + |   |   |   |   |   | + |   |  |  |   |  | 15 | -21860.5 | 43751.08 |
| + | + | + | + | + | + | + |   | + |   | + |  |  |   |  | 27 | -21883.8 | 43821.70 |
| + | + | + | + | + |   | + |   | + |   | + |  |  |   |  | 26 | -21885.1 | 43822.23 |
| + | + | + | + |   | + | + |   | + |   |   |  |  |   |  | 21 | -21905   | 43851.99 |
| + | + | + | + | + | + | + |   | + |   |   |  |  |   |  | 23 | -21903.4 | 43852.83 |
| + | + | + | + | + |   | + |   | + |   |   |  |  |   |  | 22 | -21904.7 | 43853.43 |
| + | + | + | + |   |   | + |   | + |   |   |  |  |   |  | 20 | -21906.9 | 43853.86 |
| + | + | + | + | + |   |   |   | + |   |   |  |  |   |  | 20 | -21911.7 | 43863.50 |
| + | + | + | + |   | + |   |   | + |   |   |  |  |   |  | 19 | -21913.1 | 43864.15 |
| + | + | + | + |   |   |   |   | + |   |   |  |  |   |  | 18 | -21914.6 | 43865.31 |



|   |   |   |   |   |   |   |   |   |  |   |   |  |  |  |    |          |          |
|---|---|---|---|---|---|---|---|---|--|---|---|--|--|--|----|----------|----------|
| + | + | + | + | + | + |   |   | + |  |   |   |  |  |  | 21 | -21911.9 | 43865.72 |
|   | + | + | + |   |   |   |   | + |  |   |   |  |  |  | 17 | -21916.3 | 43866.70 |
| + | + | + |   | + | + |   | + |   |  | + |   |  |  |  | 19 | -21959.7 | 43957.47 |
| + | + | + |   | + |   |   | + |   |  |   |   |  |  |  | 16 | -21964.9 | 43961.77 |
| + | + | + |   | + | + |   | + |   |  |   |   |  |  |  | 17 | -21964.8 | 43963.71 |
|   | + | + |   |   |   |   | + |   |  |   |   |  |  |  | 13 | -21968.9 | 43963.74 |
|   | + | + | + |   |   |   |   |   |  |   |   |  |  |  | 13 | -22265.4 | 44556.87 |
| + | + | + | + |   | + | + |   |   |  |   |   |  |  |  | 17 | -22262.0 | 44558.02 |
| + | + | + | + | + |   | + |   |   |  |   |   |  |  |  | 18 | -22261.0 | 44558.03 |
| + | + | + | + | + | + | + |   |   |  |   |   |  |  |  | 19 | -22260.6 | 44559.19 |
| + | + | + | + |   |   | + |   |   |  |   |   |  |  |  | 16 | -22263.6 | 44559.22 |
| + | + | + | + | + |   |   |   |   |  |   |   |  |  |  | 16 | -22266.3 | 44564.59 |
| + | + | + | + | + | + |   |   |   |  |   |   |  |  |  | 17 | -22265.8 | 44565.59 |
| + | + | + | + |   | + |   |   |   |  |   |   |  |  |  | 15 | -22268.6 | 44567.26 |
| + | + | + | + |   |   |   |   |   |  |   |   |  |  |  | 14 | -22270.2 | 44568.45 |
| + | + | + |   |   |   |   |   |   |  |   |   |  |  |  | 12 | -22393.2 | 44810.32 |
|   | + | + |   |   |   |   |   |   |  |   |   |  |  |  | 11 | -22394.8 | 44811.61 |
| + | + |   | + | + |   | + |   | + |  |   | + |  |  |  | 25 | -23416.6 | 46883.31 |
| + | + |   | + |   |   | + |   | + |  |   |   |  |  |  | 19 | -23437.6 | 46913.15 |
| + | + |   | + | + |   | + |   | + |  |   |   |  |  |  | 21 | -23435.6 | 46913.27 |
| + | + |   | + | + |   |   |   | + |  |   |   |  |  |  | 19 | -23441.8 | 46921.69 |
|   | + |   | + |   |   |   |   | + |  |   |   |  |  |  | 16 | -23446.3 | 46924.53 |
| + | + |   | + |   |   |   |   | + |  |   |   |  |  |  | 17 | -23445.7 | 46925.40 |
| + | + |   | + | + |   |   |   |   |  |   |   |  |  |  | 15 | -23794.1 | 47618.17 |
| + | + |   | + |   |   | + |   |   |  |   |   |  |  |  | 15 | -23794.6 | 47619.22 |
| + | + |   | + | + |   | + |   |   |  |   |   |  |  |  | 17 | -23792.9 | 47619.71 |
| + | + |   | + |   |   |   |   |   |  |   |   |  |  |  | 13 | -23801.0 | 47627.93 |
|   | + |   | + |   |   |   |   |   |  |   |   |  |  |  | 12 | -23803.2 | 47630.33 |
|   | + |   |   |   |   |   |   |   |  |   |   |  |  |  | 10 | -23925.6 | 47871.12 |
| + |   | + | + |   | + | + |   | + |  |   | + |  |  |  | 19 | -42745.3 | 85528.71 |
| + |   | + | + |   | + |   |   | + |  |   |   |  |  |  | 16 | -42752.0 | 85536.03 |
| + |   | + | + |   | + |   |   | + |  |   |   |  |  |  | 15 | -42756.0 | 85542.05 |
| + |   | + | + |   |   | + |   |   |  |   |   |  |  |  | 14 | -42985.3 | 85998.61 |
| + |   | + | + |   |   |   |   |   |  |   |   |  |  |  | 12 | -42987.6 | 85999.29 |
| + |   | + | + |   | + | + |   |   |  |   |   |  |  |  | 15 | -42986.9 | 86003.77 |
|   |   | + | + |   |   |   |   |   |  |   |   |  |  |  | 11 | -42992.5 | 86006.93 |
| + |   | + | + |   | + |   |   |   |  |   |   |  |  |  | 13 | -42990.8 | 86007.54 |
| + |   | + |   |   |   |   |   |   |  |   |   |  |  |  | 10 | -43101.4 | 86222.78 |
|   |   | + |   |   |   |   |   |   |  |   |   |  |  |  | 9  | -43104.1 | 86226.29 |
| + |   | + |   |   | + |   |   |   |  |   |   |  |  |  | 11 | -43102.8 | 86227.60 |
|   |   |   |   |   |   |   |   |   |  |   |   |  |  |  | 8  | -43893.0 | 87802.03 |

136 **Table S2. AIC results in terms of false positives of peak-points comparing different WU selection**  
137 **methods.** We fitted  $\text{glmmTMB}_{FalsePositive-method}$  with the ratio of levels marked as peak-points to  
138 all levels at the time of manual edit of the environmental data ( $R_{FalsePositives-method}$ ) as the  
139 dependent variable with a beta-binomial error distribution. Independent variables were: WU (3 level  
140 factor), peak-point detection method (3 level factor), position of environmental change (i.e. density  
141 of levels; 2 level factor), richness of dataset (2 level factor), and all their interactions. Individual dataset  
142 ID was selected as the random factor. We used *dredge* to calculate all possible combinations of models  
143 and ordered them by AICc. Plus-symbol (+) indicates that the predictor is included in the model.

| Diversity | Peak | Position | WU | Diversity: Peak | Diversity: Position | Diversity:WU | Peak:Position | Peak:WU | Position:WU | Diversity: Peak:Position | Diversity: Peak:WU | Diversity: Position:WU | Peak:Position:WU | Diversity: Peak:Position:WU | df       | logLik   | AICc |
|-----------|------|----------|----|-----------------|---------------------|--------------|---------------|---------|-------------|--------------------------|--------------------|------------------------|------------------|-----------------------------|----------|----------|------|
| +         | +    | +        | +  |                 |                     |              | +             | +       | +           |                          |                    |                        | +                | 26                          | -17158.7 | 34369.41 |      |
|           | +    | +        | +  |                 |                     |              | +             | +       | +           |                          |                    |                        | +                | 25                          | -17160.0 | 34369.96 |      |
| +         | +    | +        | +  | +               | +                   |              | +             | +       | +           | +                        |                    |                        | +                | 31                          | -17154.1 | 34370.22 |      |
| +         | +    | +        | +  | +               | +                   | +            | +             | +       | +           | +                        | +                  | +                      | +                | 39                          | -17146.9 | 34371.92 |      |
| +         | +    | +        | +  | +               |                     | +            | +             | +       | +           |                          | +                  |                        | +                | 34                          | -17152.1 | 34372.23 |      |
| +         | +    | +        | +  |                 | +                   |              | +             | +       | +           |                          |                    |                        | +                | 27                          | -17159.2 | 34372.38 |      |
| +         | +    | +        | +  | +               | +                   | +            | +             | +       | +           |                          | +                  | +                      | +                | 37                          | -17150.5 | 34374.96 |      |
| +         | +    | +        | +  | +               |                     |              | +             | +       | +           |                          |                    |                        | +                | 28                          | -17159.6 | 34375.22 |      |
| +         | +    | +        | +  |                 |                     | +            | +             | +       | +           |                          |                    |                        | +                | 28                          | -17159.8 | 34375.57 |      |
| +         | +    | +        | +  |                 | +                   | +            | +             | +       | +           |                          |                    |                        | +                | 29                          | -17159.1 | 34376.29 |      |
| +         | +    | +        | +  | +               | +                   | +            | +             | +       | +           |                          | +                  |                        | +                | 35                          | -17153.4 | 34376.82 |      |
| +         | +    | +        | +  | +               | +                   |              | +             | +       | +           |                          |                    |                        | +                | 29                          | -17160.2 | 34378.49 |      |
| +         | +    | +        | +  | +               |                     | +            | +             | +       | +           |                          |                    |                        | +                | 30                          | -17159.3 | 34378.59 |      |
| +         | +    | +        | +  |                 | +                   | +            | +             | +       | +           |                          |                    | +                      | +                | 31                          | -17158.8 | 34379.59 |      |
| +         | +    | +        | +  | +               | +                   | +            | +             | +       | +           |                          |                    |                        | +                | 31                          | -17158.8 | 34379.67 |      |
| +         | +    | +        | +  | +               | +                   |              | +             | +       | +           | +                        |                    |                        |                  | 27                          | -17172.8 | 34399.67 |      |
| +         | +    | +        | +  | +               | +                   | +            | +             | +       | +           | +                        | +                  | +                      |                  | 35                          | -17165.7 | 34401.38 |      |
|           | +    | +        | +  |                 |                     |              | +             | +       | +           |                          |                    |                        |                  | 21                          | -17181.2 | 34404.46 |      |
| +         | +    | +        | +  | +               | +                   | +            | +             | +       | +           | +                        |                    | +                      |                  | 31                          | -17171.3 | 34404.70 |      |
| +         | +    | +        | +  | +               |                     |              | +             | +       | +           |                          |                    |                        |                  | 24                          | -17179.0 | 34406.03 |      |
| +         | +    | +        | +  | +               |                     | +            | +             | +       | +           |                          | +                  |                        |                  | 30                          | -17173.1 | 34406.31 |      |
| +         | +    | +        | +  |                 |                     | +            | +             | +       | +           |                          |                    |                        |                  | 24                          | -17179.3 | 34406.61 |      |
| +         | +    | +        | +  | +               | +                   | +            | +             | +       | +           |                          | +                  |                        |                  | 31                          | -17172.6 | 34407.15 |      |
| +         | +    | +        | +  | +               | +                   | +            | +             | +       | +           |                          | +                  | +                      |                  | 33                          | -17170.8 | 34407.66 |      |
| +         | +    | +        | +  |                 |                     |              | +             | +       | +           |                          |                    |                        |                  | 22                          | -17182.0 | 34407.94 |      |
| +         | +    | +        | +  |                 | +                   | +            | +             | +       | +           |                          |                    | +                      |                  | 27                          | -17177.0 | 34408.06 |      |
| +         | +    | +        | +  | +               |                     | +            | +             | +       | +           |                          |                    |                        |                  | 26                          | -17178.9 | 34409.76 |      |

|   |   |   |   |   |   |   |   |   |   |   |   |   |  |  |    |          |          |
|---|---|---|---|---|---|---|---|---|---|---|---|---|--|--|----|----------|----------|
| + | + | + | + | + | + | + | + | + | + |   |   |   |  |  | 27 | -17178.6 | 34411.31 |
| + | + | + | + | + | + | + | + | + | + |   |   | + |  |  | 29 | -17176.7 | 34411.46 |
| + | + | + | + |   | + |   | + | + | + |   |   |   |  |  | 23 | -17182.8 | 34411.56 |
| + | + | + | + |   | + | + | + | + | + |   |   |   |  |  | 25 | -17181.7 | 34413.52 |
| + | + | + | + | + | + |   | + | + | + |   |   |   |  |  | 25 | -17182.9 | 34415.87 |
| + | + | + | + |   |   |   | + | + |   |   |   |   |  |  | 20 | -17240.9 | 34521.86 |
| + | + | + | + | + | + | + | + | + |   | + | + |   |  |  | 31 | -17230.4 | 34522.79 |
| + | + | + | + | + | + |   | + | + |   | + |   |   |  |  | 25 | -17236.7 | 34523.47 |
|   | + | + | + |   |   |   | + | + |   |   |   |   |  |  | 19 | -17244.0 | 34526.00 |
| + | + | + | + | + | + | + | + | + |   | + |   |   |  |  | 27 | -17236.7 | 34527.46 |
| + | + | + | + |   |   | + | + | + |   |   |   |   |  |  | 22 | -17242.0 | 34527.97 |
| + | + | + | + |   | + |   | + | + |   |   |   |   |  |  | 21 | -17243.3 | 34528.67 |
| + | + | + | + |   | + | + | + | + |   |   |   |   |  |  | 23 | -17242.6 | 34531.14 |
| + | + | + | + | + |   | + | + | + |   |   | + |   |  |  | 28 | -17237.6 | 34531.19 |
| + | + | + | + | + | + |   | + | + |   |   |   |   |  |  | 23 | -17243.9 | 34533.78 |
| + | + | + | + | + | + | + | + | + |   |   | + |   |  |  | 29 | -17239.6 | 34537.16 |
| + | + | + | + | + |   | + | + | + |   |   |   |   |  |  | 24 | -17247.3 | 34542.53 |
|   | + | + | + |   |   |   | + |   | + |   |   |   |  |  | 17 | -17589.8 | 35213.68 |
| + | + | + | + | + |   |   | + |   | + |   |   |   |  |  | 20 | -17591.3 | 35222.57 |
| + | + | + | + | + |   | + | + |   | + |   |   |   |  |  | 22 | -17591.3 | 35226.55 |
| + | + | + |   | + | + |   | + |   |   | + |   |   |  |  | 19 | -17831.3 | 35700.59 |
| + | + | + |   |   |   |   | + |   |   |   |   |   |  |  | 14 | -17838.0 | 35704.06 |
| + | + | + |   | + |   |   | + |   |   |   |   |   |  |  | 16 | -17837.5 | 35707.03 |
| + | + | + | + | + | + | + | + |   |   | + |   |   |  |  | 23 | -17830.8 | 35707.57 |
| + | + | + |   | + | + |   | + |   |   |   |   |   |  |  | 17 | -17837.0 | 35708.09 |
| + | + | + | + |   | + |   | + |   |   |   |   |   |  |  | 17 | -17837.4 | 35708.85 |
| + | + | + | + | + |   |   | + |   |   |   |   |   |  |  | 18 | -17837.4 | 35710.80 |
| + | + | + | + |   | + | + | + |   |   |   |   |   |  |  | 19 | -17837.3 | 35712.65 |
| + | + | + | + | + | + | + | + |   |   |   |   |   |  |  | 21 | -17837.0 | 35716.10 |
| + | + | + | + |   |   |   |   | + | + |   |   |   |  |  | 20 | -18751.2 | 37542.41 |
| + | + | + | + | + |   | + |   | + | + |   | + |   |  |  | 28 | -18744.6 | 37545.23 |
| + | + | + | + |   |   | + |   | + | + |   |   |   |  |  | 22 | -18750.7 | 37545.44 |
| + | + | + | + | + | + | + |   | + | + |   | + | + |  |  | 31 | -18742.3 | 37546.66 |
| + | + | + | + | + | + |   |   | + | + |   |   |   |  |  | 23 | -18750.4 | 37546.80 |
| + | + | + | + | + |   | + |   | + | + |   |   |   |  |  | 24 | -18750.8 | 37549.53 |
| + | + | + | + | + | + | + |   | + | + |   |   | + |  |  | 27 | -18748.2 | 37550.43 |
| + | + | + | + | + | + | + |   | + | + |   |   |   |  |  | 25 | -18750.8 | 37551.69 |
| + | + | + | + | + | + | + |   | + | + |   | + |   |  |  | 29 | -18748.7 | 37555.39 |
| + | + | + | + |   | + | + |   | + |   |   |   |   |  |  | 21 | -18990.5 | 38023.01 |
| + | + | + | + | + | + |   |   | + |   |   |   |   |  |  | 21 | -18991.1 | 38024.29 |
| + | + | + | + | + | + | + |   | + |   |   | + |   |  |  | 27 | -18985.9 | 38025.78 |
| + | + | + | + | + |   | + |   | + |   |   |   |   |  |  | 22 | -18991.3 | 38026.59 |
| + | + |   | + | + |   |   |   | + |   |   |   |   |  |  | 19 | -19049.0 | 38136.08 |
| + | + |   | + | + |   | + |   | + |   |   | + |   |  |  | 25 | -19043.2 | 38136.35 |

|   |   |   |   |   |   |   |   |   |   |   |  |  |  |  |  |    |          |          |
|---|---|---|---|---|---|---|---|---|---|---|--|--|--|--|--|----|----------|----------|
| + | + |   | + | + |   | + |   | + |   |   |  |  |  |  |  | 21 | -19048.9 | 38139.91 |
| + | + | + | + | + | + | + |   |   | + |   |  |  |  |  |  | 21 | -19323.4 | 38688.80 |
| + | + | + |   | + | + |   |   |   |   |   |  |  |  |  |  | 15 | -19547.9 | 39125.81 |
| + | + | + | + |   |   |   |   |   |   |   |  |  |  |  |  | 14 | -19550.2 | 39128.44 |
| + | + | + | + | + |   |   |   |   |   |   |  |  |  |  |  | 16 | -19549.6 | 39131.13 |
| + | + | + | + |   |   | + |   |   |   |   |  |  |  |  |  | 16 | -19549.8 | 39131.60 |
| + | + | + | + | + |   | + |   |   |   |   |  |  |  |  |  | 18 | -19548.1 | 39132.21 |
| + | + | + | + | + | + | + |   |   |   |   |  |  |  |  |  | 19 | -19549.0 | 39135.92 |
| + | + |   |   |   |   |   |   |   |   |   |  |  |  |  |  | 11 | -19606.7 | 39235.46 |
|   | + |   |   |   |   |   |   |   |   |   |  |  |  |  |  | 10 | -19608.1 | 39236.23 |
| + | + |   |   | + |   |   |   |   |   |   |  |  |  |  |  | 13 | -19606.8 | 39239.65 |
| + |   | + | + |   |   |   |   |   |   | + |  |  |  |  |  | 14 | -27510.5 | 55048.94 |
| + |   | + | + |   |   | + |   |   |   | + |  |  |  |  |  | 16 | -27509.8 | 55051.63 |
| + |   | + | + |   |   | + | + |   |   | + |  |  |  |  |  | 17 | -27510.0 | 55054.02 |
| + |   | + |   |   |   | + |   |   |   |   |  |  |  |  |  | 11 | -27685.0 | 55392.02 |
|   |   | + | + |   |   |   |   |   |   |   |  |  |  |  |  | 11 | -27686.0 | 55394.01 |
| + |   | + | + |   |   |   |   |   |   |   |  |  |  |  |  | 12 | -27685.5 | 55395.01 |
| + |   | + | + |   |   |   |   | + |   |   |  |  |  |  |  | 14 | -27685.4 | 55398.90 |
| + |   | + | + |   |   | + | + |   |   |   |  |  |  |  |  | 15 | -27684.9 | 55399.81 |
|   |   |   |   |   |   |   |   |   |   |   |  |  |  |  |  | 8  | -27727.8 | 55471.52 |
| + |   |   | + |   |   |   |   | + |   |   |  |  |  |  |  | 13 | -27729.1 | 55484.15 |

144

145 **Table S3. AIC results in terms of successful detection of peak-points using binning with moving**  
146 **window method and GAM peak-point detection methods.** We fitted  $g\text{]mmTMB}_{\text{success-settings}}$  with  
147  $R_{\text{success-settings}}$  dependent variable respectively with beta-binomial error distribution. Independent  
148 variables were: smoothing type (5 level factor), dissimilarity coefficient (4 level factor), position of  
149 environmental change (i.e. density of levels; 2 level factor), richness of dataset (2 level factor), and all  
150 their interactions. Individual dataset ID was selected as the random factor. We used *dredge* to  
151 calculate all possible combination of models and order them by AICc. Plus-symbol (+) indicates that  
152 the predictor is included in the model.

| DC | Richness | Position | Smooth | DC:Richness | DC:Position | DC:Smooth | Richness: Position | Richness: Smooth | Position: Smooth | DC:Richness:Position | DC:Richness: Smooth | DC:Position: Smooth | Richness: Position: Smooth | DC:Richness:Position: Smooth | df | logLik   | AICc     |
|----|----------|----------|--------|-------------|-------------|-----------|--------------------|------------------|------------------|----------------------|---------------------|---------------------|----------------------------|------------------------------|----|----------|----------|
| +  | +        | +        | +      |             | +           |           | +                  | +                | +                |                      |                     |                     | +                          |                              | 28 | -2972.51 | 6001.226 |
| +  | +        | +        | +      |             |             |           | +                  | +                | +                |                      |                     |                     | +                          |                              | 25 | -2975.59 | 6001.334 |
| +  | +        | +        | +      | +           | +           |           | +                  | +                | +                | +                    |                     |                     | +                          |                              | 34 | -2967.05 | 6002.392 |
| +  | +        | +        | +      | +           | +           |           | +                  | +                | +                |                      |                     |                     | +                          |                              | 31 | -2970.10 | 6002.443 |

|   |   |   |   |   |   |   |   |   |   |   |  |   |   |  |    |          |          |
|---|---|---|---|---|---|---|---|---|---|---|--|---|---|--|----|----------|----------|
| + | + | + | + | + |   |   | + | + | + |   |  |   | + |  | 28 | -2973.27 | 6002.736 |
|   | + | + | + |   |   |   | + | + | + |   |  |   | + |  | 22 | -2980.85 | 6005.824 |
| + | + | + | + |   | + |   | + |   | + |   |  |   |   |  | 20 | -2982.92 | 6005.942 |
| + | + | + | + |   |   |   | + |   | + |   |  |   |   |  | 17 | -2986.15 | 6006.369 |
| + | + | + | + | + | + |   | + |   | + |   |  |   |   |  | 23 | -2980.73 | 6007.590 |
| + | + | + | + | + | + |   | + |   | + | + |  |   |   |  | 26 | -2977.78 | 6007.739 |
| + | + | + | + | + |   |   | + |   | + |   |  |   |   |  | 20 | -2983.85 | 6007.808 |
| + | + | + | + |   | + | + | + | + | + |   |  |   | + |  | 40 | -2963.92 | 6008.251 |
| + | + | + | + | + | + |   |   |   | + |   |  |   |   |  | 22 | -2982.27 | 6008.668 |
| + | + | + | + | + |   |   |   |   | + |   |  |   |   |  | 19 | -2985.33 | 6008.745 |
| + | + | + | + | + | + | + | + | + | + |   |  |   | + |  | 43 | -2961.52 | 6009.519 |
| + | + | + | + |   |   | + | + | + | + |   |  |   | + |  | 37 | -2967.63 | 6009.623 |
| + | + | + | + | + | + | + | + | + | + | + |  |   | + |  | 46 | -2958.75 | 6010.037 |
| + | + | + | + |   | + |   | + | + | + |   |  |   |   |  | 24 | -2981.16 | 6010.479 |
|   | + | + | + |   |   |   | + |   | + |   |  |   |   |  | 14 | -2991.43 | 6010.906 |
| + | + | + | + | + |   | + | + | + | + |   |  |   | + |  | 40 | -2965.37 | 6011.153 |
|   | + | + | + |   |   |   |   |   | + |   |  |   |   |  | 13 | -2992.86 | 6011.759 |
| + | + | + | + | + | + |   | + | + | + |   |  |   |   |  | 27 | -2978.81 | 6011.804 |
| + | + | + | + | + | + |   | + | + | + | + |  |   |   |  | 30 | -2975.81 | 6011.844 |
| + | + | + | + | + |   |   | + | + | + |   |  |   |   |  | 24 | -2981.93 | 6012.009 |
| + |   | + | + |   | + |   |   |   | + |   |  |   |   |  | 18 | -2988.35 | 6012.795 |
| + |   | + | + |   |   |   |   |   | + |   |  |   |   |  | 15 | -2991.42 | 6012.903 |
| + | + | + | + |   | + |   |   | + | + |   |  |   |   |  | 23 | -2983.40 | 6012.941 |
| + | + | + | + |   | + | + | + |   | + |   |  |   |   |  | 32 | -2974.48 | 6013.224 |
| + | + | + | + |   | + | + | + | + | + |   |  | + | + |  | 52 | -2954.55 | 6013.798 |
| + | + | + | + |   | + | + |   |   | + |   |  |   |   |  | 31 | -2975.93 | 6014.106 |
| + | + | + | + | + |   |   |   | + | + |   |  |   |   |  | 23 | -2984.15 | 6014.444 |
| + | + | + | + | + | + | + | + |   | + |   |  |   |   |  | 35 | -2972.08 | 6014.486 |
| + | + | + | + | + | + |   |   | + | + |   |  |   |   |  | 26 | -2981.17 | 6014.524 |
| + | + | + | + |   |   | + | + |   | + |   |  |   |   |  | 29 | -2978.20 | 6014.612 |
| + | + | + | + | + | + | + | + |   | + | + |  |   |   |  | 38 | -2969.18 | 6014.732 |
| + | + | + | + | + | + | + | + | + | + |   |  | + | + |  | 55 | -2952.06 | 6014.886 |
|   | + | + | + |   |   |   | + | + | + |   |  |   |   |  | 18 | -2989.50 | 6015.081 |
| + | + | + | + | + | + | + | + | + | + | + |  | + | + |  | 58 | -2949.11 | 6015.089 |
| + | + | + | + |   |   | + |   |   | + |   |  |   |   |  | 28 | -2979.63 | 6015.458 |
| + | + | + | + | + | + | + |   |   | + |   |  |   |   |  | 34 | -2973.62 | 6015.548 |
| + | + | + | + | + |   | + | + |   | + |   |  |   |   |  | 32 | -2975.85 | 6015.969 |
| + | + | + | + | + |   | + |   |   | + |   |  |   |   |  | 31 | -2977.34 | 6016.920 |
|   |   | + | + |   |   |   |   |   | + |   |  |   |   |  | 12 | -2996.69 | 6017.425 |
| + | + | + | + |   | + | + | + | + | + |   |  |   |   |  | 36 | -2972.57 | 6017.469 |
| + | + | + | + | + | + | + | + | + | + |   |  |   |   |  | 39 | -2970.16 | 6018.713 |
| + | + | + | + |   |   | + | + | + | + |   |  |   |   |  | 33 | -2976.28 | 6018.835 |
| + | + | + | + |   | + | + | + |   | + |   |  | + |   |  | 44 | -2965.21 | 6018.918 |
| + | + | + | + | + | + | + | + | + | + | + |  |   |   |  | 42 | -2967.24 | 6018.936 |

|   |   |   |   |   |   |   |   |   |   |   |   |   |   |    |          |          |
|---|---|---|---|---|---|---|---|---|---|---|---|---|---|----|----------|----------|
| + | + | + | + |   | + | + |   |   | + |   |   |   |   | 43 | -2966.67 | 6019.816 |
| + |   | + | + |   | + | + |   |   | + |   |   |   |   | 30 | -2979.80 | 6019.829 |
| + | + | + | + |   | + | + |   | + | + |   |   |   |   | 35 | -2974.80 | 6019.919 |
| + | + | + | + | + | + | + | + |   | + |   |   | + |   | 47 | -2962.82 | 6020.215 |
| + | + | + | + | + |   | + | + | + | + |   |   |   |   | 36 | -2973.95 | 6020.241 |
| + | + | + | + | + | + | + | + |   | + | + |   | + |   | 50 | -2960.01 | 6020.654 |
| + | + | + | + | + | + | + |   |   | + |   |   | + |   | 46 | -2964.35 | 6021.235 |
| + | + | + | + |   |   | + |   | + | + |   |   |   |   | 32 | -2978.49 | 6021.246 |
| + |   | + | + |   |   | + |   |   | + |   |   |   |   | 27 | -2983.53 | 6021.249 |
| + | + | + | + | + | + | + |   | + | + |   |   |   |   | 38 | -2972.50 | 6021.382 |
| + | + | + | + | + |   | + |   | + | + |   |   |   |   | 35 | -2976.22 | 6022.752 |
| + | + | + | + |   | + | + | + | + | + |   |   | + |   | 48 | -2963.26 | 6023.115 |
| + | + | + | + | + | + | + | + | + | + |   |   | + |   | 51 | -2960.88 | 6024.423 |
| + | + | + | + | + | + | + | + | + | + | + |   | + |   | 54 | -2958.04 | 6024.832 |
| + |   | + | + |   | + | + |   |   | + |   |   | + |   | 42 | -2970.52 | 6025.494 |
| + | + | + | + |   | + | + |   | + | + |   |   | + |   | 47 | -2965.56 | 6025.679 |
| + | + | + | + | + | + | + |   | + | + |   |   | + |   | 50 | -2963.24 | 6027.122 |
| + | + | + | + | + | + | + | + | + | + |   | + |   | + | 55 | -2960.12 | 6031.009 |
| + | + | + | + | + | + | + | + | + | + | + | + |   | + | 58 | -2957.15 | 6031.169 |
| + | + | + | + | + |   | + | + | + | + |   | + |   | + | 52 | -2964.04 | 6032.779 |
| + | + | + | + | + | + | + | + | + | + | + | + | + | + | 70 | -2947.45 | 6036.148 |
| + | + | + | + | + | + | + | + | + | + |   | + | + | + | 67 | -2950.68 | 6036.504 |
| + | + | + | + | + | + | + | + | + | + |   | + |   |   | 51 | -2968.77 | 6040.217 |
| + | + | + | + | + | + | + | + | + | + | + | + |   |   | 54 | -2965.77 | 6040.282 |
| + | + | + | + | + |   | + | + | + | + |   | + |   |   | 48 | -2972.60 | 6041.782 |
| + | + | + | + | + | + | + |   | + | + |   | + |   |   | 50 | -2971.14 | 6042.916 |
| + | + | + | + | + |   | + |   | + | + |   | + |   |   | 47 | -2974.86 | 6044.279 |
| + | + | + | + | + | + | + | + | + | + |   | + | + |   | 63 | -2959.41 | 6045.843 |
| + | + | + | + | + | + | + | + | + | + | + | + | + |   | 66 | -2956.50 | 6046.120 |
| + | + | + | + | + | + | + |   | + | + |   | + | + |   | 62 | -2961.88 | 6048.746 |
| + | + | + | + | + | + | + | + | + | + | + | + | + | + | 82 | -2942.35 | 6050.413 |
| + | + | + | + |   | + |   | + |   |   |   |   |   |   | 16 | -3101.31 | 6234.691 |
| + | + | + | + |   |   |   |   |   |   |   |   |   |   | 12 | -3105.58 | 6235.198 |
| + | + | + | + |   | + |   |   |   |   |   |   |   |   | 15 | -3102.68 | 6235.419 |
| + | + | + | + | + |   |   | + |   |   |   |   |   |   | 16 | -3102.00 | 6236.075 |
| + | + | + | + | + | + |   | + |   |   |   |   |   |   | 19 | -3099.02 | 6236.130 |
| + | + | + | + | + | + |   | + |   |   | + |   |   |   | 22 | -3096.19 | 6236.515 |
| + | + | + | + | + |   |   |   |   |   |   |   |   |   | 15 | -3103.43 | 6236.918 |
| + | + | + | + | + | + |   |   |   |   |   |   |   |   | 18 | -3100.51 | 6237.103 |
|   | + | + | + |   |   |   | + |   |   |   |   |   |   | 10 | -3109.38 | 6238.797 |
| + |   | + | + |   |   |   |   |   |   |   |   |   |   | 11 | -3109.35 | 6240.733 |
| + | + | + | + |   |   |   | + | + |   |   |   |   |   | 17 | -3103.41 | 6240.899 |
| + | + | + | + |   | + | + | + |   |   |   |   |   |   | 28 | -3092.73 | 6241.656 |
| + | + | + | + |   |   |   |   | + |   |   |   |   |   | 16 | -3104.82 | 6241.699 |

|   |   |   |   |   |   |   |   |   |   |   |   |  |   |  |  |    |          |          |
|---|---|---|---|---|---|---|---|---|---|---|---|--|---|--|--|----|----------|----------|
| + | + | + | + |   |   | + | + |   |   |   |   |  |   |  |  | 25 | -3095.80 | 6241.759 |
| + | + | + | + |   | + |   |   | + |   |   |   |  |   |  |  | 19 | -3101.87 | 6241.843 |
| + | + | + | + |   | + | + |   |   |   |   |   |  |   |  |  | 27 | -3094.11 | 6242.408 |
| + | + | + | + | + |   |   | + | + |   |   |   |  |   |  |  | 20 | -3101.21 | 6242.517 |
| + | + | + | + |   |   | + |   |   |   |   |   |  |   |  |  | 24 | -3097.19 | 6242.537 |
| + | + | + | + | + | + |   | + | + |   |   |   |  |   |  |  | 23 | -3098.22 | 6242.579 |
| + | + | + | + | + | + |   | + | + |   | + |   |  |   |  |  | 26 | -3095.38 | 6242.934 |
| + | + | + | + | + | + | + | + |   |   |   |   |  |   |  |  | 31 | -3090.38 | 6243.017 |
| + | + | + | + | + |   | + | + |   |   |   |   |  |   |  |  | 28 | -3093.57 | 6243.354 |
| + | + | + | + | + |   |   |   |   | + |   |   |  |   |  |  | 19 | -3102.63 | 6243.363 |
| + | + | + | + | + | + |   |   |   | + |   |   |  |   |  |  | 22 | -3099.65 | 6243.419 |
| + | + | + | + | + | + | + |   |   |   |   |   |  |   |  |  | 30 | -3091.89 | 6244.007 |
| + | + | + | + | + |   | + |   |   |   |   |   |  |   |  |  | 27 | -3094.98 | 6244.154 |
|   |   | + | + |   |   |   |   |   |   |   |   |  |   |  |  | 8  | -3114.47 | 6244.968 |
|   | + | + | + |   |   |   |   | + | + |   |   |  |   |  |  | 14 | -3108.56 | 6245.175 |
|   | + | + | + |   |   |   |   |   | + |   |   |  |   |  |  | 13 | -3109.94 | 6245.931 |
| + |   | + | + |   | + | + |   |   |   |   |   |  |   |  |  | 26 | -3097.86 | 6247.891 |
| + | + | + | + |   | + | + | + | + |   |   |   |  |   |  |  | 32 | -3091.91 | 6248.077 |
| + | + | + | + |   |   | + | + | + |   |   |   |  |   |  |  | 29 | -3095.00 | 6248.218 |
| + | + | + | + |   | + | + |   | + |   |   |   |  |   |  |  | 31 | -3093.29 | 6248.821 |
| + | + | + | + |   |   | + |   | + |   |   |   |  |   |  |  | 28 | -3096.39 | 6248.983 |
| + | + | + | + | + | + | + | + | + |   |   |   |  |   |  |  | 35 | -3089.60 | 6249.517 |
| + | + | + | + | + |   | + | + | + |   |   |   |  |   |  |  | 32 | -3092.78 | 6249.828 |
| + | + | + | + | + | + | + | + | + |   | + |   |  |   |  |  | 38 | -3086.78 | 6249.924 |
| + | + | + | + | + | + | + |   | + |   |   |   |  |   |  |  | 34 | -3091.10 | 6250.501 |
| + | + | + | + | + |   | + |   | + |   |   |   |  |   |  |  | 31 | -3094.18 | 6250.606 |
| + | + | + | + | + | + | + | + | + |   |   |   |  | + |  |  | 47 | -3088.18 | 6270.926 |
| + | + | + | + | + |   | + | + | + |   |   |   |  | + |  |  | 44 | -3091.31 | 6271.110 |
| + | + | + | + | + | + | + | + | + |   | + | + |  |   |  |  | 50 | -3085.32 | 6271.289 |
| + | + | + | + | + | + | + |   | + |   |   |   |  | + |  |  | 46 | -3089.65 | 6271.847 |
| + | + | + | + | + |   | + |   | + |   |   |   |  | + |  |  | 43 | -3092.74 | 6271.947 |
| + | + | + |   |   |   |   |   | + |   |   |   |  |   |  |  | 9  | -3130.92 | 6279.870 |
| + | + | + |   |   | + |   |   | + |   |   |   |  |   |  |  | 12 | -3128.11 | 6280.264 |
| + | + | + |   |   |   |   |   |   |   |   |   |  |   |  |  | 8  | -3132.41 | 6280.835 |
| + | + | + |   |   | + |   |   |   |   |   |   |  |   |  |  | 11 | -3129.49 | 6281.004 |
| + | + | + |   | + |   |   |   | + |   |   |   |  |   |  |  | 12 | -3128.86 | 6281.766 |
| + | + | + |   | + | + |   |   | + |   |   |   |  |   |  |  | 15 | -3125.86 | 6281.776 |
| + | + | + |   | + | + |   |   | + |   | + |   |  |   |  |  | 18 | -3123.03 | 6282.137 |
| + | + | + |   | + |   |   |   |   |   |   |   |  |   |  |  | 11 | -3130.29 | 6282.613 |
| + | + | + |   | + | + |   |   |   |   |   |   |  |   |  |  | 14 | -3127.34 | 6282.734 |
|   | + | + |   |   |   |   |   | + |   |   |   |  |   |  |  | 6  | -3136.09 | 6284.189 |
| + |   | + |   |   |   |   |   |   |   |   |   |  |   |  |  | 7  | -3136.15 | 6286.318 |
| + |   | + |   |   | + |   |   |   |   |   |   |  |   |  |  | 10 | -3133.20 | 6286.422 |
|   |   | + |   |   |   |   |   |   |   |   |   |  |   |  |  | 4  | -3141.23 | 6290.473 |

|   |   |  |   |   |  |  |  |   |   |   |  |  |  |   |  |    |          |          |
|---|---|--|---|---|--|--|--|---|---|---|--|--|--|---|--|----|----------|----------|
| + | + |  | + |   |  |  |  |   |   |   |  |  |  |   |  | 11 | -3521.13 | 7064.301 |
| + | + |  | + | + |  |  |  |   |   |   |  |  |  |   |  | 14 | -3519.15 | 7066.357 |
|   | + |  | + |   |  |  |  |   |   |   |  |  |  |   |  | 8  | -3525.74 | 7067.502 |
| + |   |  | + |   |  |  |  |   |   |   |  |  |  |   |  | 10 | -3524.51 | 7069.048 |
| + | + |  | + |   |  |  |  |   | + |   |  |  |  |   |  | 15 | -3520.43 | 7070.912 |
|   |   |  | + |   |  |  |  |   |   |   |  |  |  |   |  | 7  | -3529.13 | 7072.276 |
| + | + |  | + | + |  |  |  |   | + |   |  |  |  |   |  | 18 | -3518.46 | 7073.004 |
| + | + |  | + |   |  |  |  | + |   |   |  |  |  |   |  | 23 | -3513.47 | 7073.085 |
|   | + |  | + |   |  |  |  |   | + |   |  |  |  |   |  | 12 | -3525.03 | 7074.107 |
| + | + |  | + | + |  |  |  | + |   |   |  |  |  |   |  | 26 | -3511.48 | 7075.135 |
| + |   |  | + |   |  |  |  | + |   |   |  |  |  |   |  | 22 | -3516.83 | 7077.793 |
| + | + |  | + |   |  |  |  | + |   | + |  |  |  |   |  | 27 | -3512.74 | 7079.661 |
| + | + |  | + | + |  |  |  | + |   | + |  |  |  |   |  | 30 | -3510.76 | 7081.761 |
| + | + |  | + | + |  |  |  | + |   | + |  |  |  | + |  | 42 | -3509.47 | 7103.394 |
| + | + |  |   |   |  |  |  |   |   |   |  |  |  |   |  | 7  | -3545.24 | 7104.489 |
| + | + |  |   | + |  |  |  |   |   |   |  |  |  |   |  | 10 | -3543.3  | 7106.63  |
|   | + |  |   |   |  |  |  |   |   |   |  |  |  |   |  | 4  | -3549.83 | 7107.657 |
| + |   |  |   |   |  |  |  |   |   |   |  |  |  |   |  | 6  | -3548.64 | 7109.292 |
|   |   |  |   |   |  |  |  |   |   |   |  |  |  |   |  | 3  | -3553.19 | 7112.384 |

153

154 **Table S4. AIC results in terms of false positives of peak-points using binning with a moving window**  
155 **method and the GAM peak-point detection methods.** We fitted  $g\text{lm}m\text{TMB}_{FalsePositive-settings}$  with  
156  $R_{FalsePositive-settings}$  as dependent variable with a beta-binomial error distribution. Independent  
157 variables were: smoothing type (5 level factor), dissimilarity coefficient (4 level factor), position of  
158 environmental change (i.e. density of levels; 2 level factor), richness of dataset (2 level factor), and all  
159 their interactions. Individual dataset ID was selected as the random factor. We used *dredge* to  
160 calculate all possible combination of models and ordered them by AICc. Plus-symbol (+) indicates that  
161 the predictor is included in the model.

| DC | Diversity | Position | Smooth | DC:Diversity | DC:Position | DC:Smooth | Diversity:Position | Diversity:Smooth | Position:Smooth | DC:Diversity:Position | DC:Diversity:Smooth | DC:Position:Smooth | Diversity:Position:Smooth | DC:Diversity:Position:Smooth | df | logLik   | AICc     |
|----|-----------|----------|--------|--------------|-------------|-----------|--------------------|------------------|-----------------|-----------------------|---------------------|--------------------|---------------------------|------------------------------|----|----------|----------|
| +  | +         | +        | +      |              |             |           | +                  |                  | +               |                       |                     |                    |                           |                              | 17 | -825.104 | 1684.284 |
|    | +         | +        | +      |              |             |           | +                  |                  | +               |                       |                     |                    |                           |                              | 14 | -828.397 | 1684.846 |
| +  | +         | +        | +      |              |             |           | +                  |                  |                 |                       |                     |                    |                           |                              | 13 | -830.126 | 1686.298 |
|    |           | +        | +      |              |             |           |                    |                  | +               |                       |                     |                    |                           |                              | 12 | -831.255 | 1686.550 |
| +  | +         | +        | +      |              |             |           |                    |                  | +               |                       |                     |                    |                           |                              | 16 | -827.749 | 1687.565 |
| +  |           | +        | +      |              |             |           |                    |                  |                 |                       |                     |                    |                           |                              | 11 | -833.052 | 1688.137 |



|   |   |   |   |   |   |   |   |   |   |   |   |  |   |   |    |          |          |
|---|---|---|---|---|---|---|---|---|---|---|---|--|---|---|----|----------|----------|
|   |   | + | + |   |   |   |   |   |   |   |   |  |   |   | 8  | -836.302 | 1688.622 |
| + | + | + | + |   |   |   |   |   |   |   |   |  |   |   | 12 | -832.749 | 1689.537 |
|   |   | + | + |   |   |   |   |   |   |   |   |  |   |   | 9  | -836.089 | 1690.201 |
| + |   | + | + |   | + |   |   |   | + |   |   |  |   |   | 18 | -827.533 | 1691.151 |
| + | + | + | + |   | + |   | + |   |   |   |   |  |   |   | 16 | -829.679 | 1691.427 |
| + | + | + | + |   | + |   |   |   | + |   |   |  |   |   | 19 | -827.304 | 1692.703 |
| + |   | + | + |   | + |   |   |   |   |   |   |  |   |   | 14 | -832.471 | 1692.995 |
| + | + | + | + | + |   |   |   |   | + |   |   |  |   |   | 19 | -827.702 | 1693.498 |
| + | + | + | + |   |   |   | + | + |   |   |   |  |   |   | 17 | -829.850 | 1693.777 |
| + | + | + | + |   |   |   |   | + | + |   |   |  |   |   | 20 | -827.436 | 1694.977 |
| + | + | + | + | + | + |   | + |   | + |   |   |  |   |   | 23 | -824.591 | 1695.321 |
| + | + | + | + | + |   |   |   |   |   |   |   |  |   |   | 15 | -832.652 | 1695.365 |
| + | + | + | + |   |   |   |   |   | + |   |   |  |   |   | 16 | -832.481 | 1697.030 |
|   |   | + | + | + |   |   |   |   | + |   |   |  |   |   | 13 | -835.719 | 1697.483 |
| + | + | + | + |   | + |   | + | + |   |   |   |  |   |   | 20 | -829.327 | 1698.760 |
| + | + | + | + | + |   |   | + | + |   |   |   |  |   |   | 20 | -829.744 | 1699.593 |
| + | + | + | + | + | + |   |   |   |   |   |   |  |   |   | 18 | -832.194 | 1700.473 |
| + | + | + | + | + |   |   |   | + |   |   |   |  |   |   | 19 | -832.415 | 1702.925 |
| + | + | + | + | + | + |   | + |   |   |   | + |  |   |   | 22 | -829.689 | 1703.505 |
| + |   | + | + |   |   |   | + |   |   | + |   |  |   |   | 27 | -825.377 | 1704.943 |
| + | + | + | + | + |   |   | + | + | + |   |   |  |   | + | 28 | -824.659 | 1705.521 |
| + |   | + | + |   |   |   | + |   |   |   |   |  |   |   | 23 | -830.575 | 1707.289 |
| + | + | + | + | + | + |   | + | + | + |   |   |  |   | + | 31 | -824.196 | 1710.641 |
| + |   | + | + |   | + | + |   |   |   |   |   |  |   |   | 26 | -829.918 | 1712.012 |
| + | + | + | + | + |   |   | + |   |   |   |   |  |   |   | 27 | -830.175 | 1714.540 |
| + | + | + | + |   |   |   | + |   | + |   |   |  |   |   | 28 | -829.918 | 1716.039 |
| + | + | + | + | + | + | + |   |   | + |   |   |  |   |   | 34 | -824.179 | 1716.657 |
| + | + | + | + | + |   |   | + | + | + |   |   |  |   |   | 32 | -827.049 | 1718.363 |
| + | + | + | + |   | + | + |   |   | + | + |   |  |   |   | 35 | -824.049 | 1718.414 |
| + | + | + | + | + | + | + |   |   |   |   |   |  |   |   | 30 | -829.119 | 1718.471 |
| + | + | + | + |   | + | + |   |   | + |   |   |  |   |   | 31 | -829.459 | 1721.166 |
| + | + | + | + | + | + | + | + | + | + |   |   |  |   |   | 35 | -826.810 | 1723.937 |
| + | + | + | + | + |   |   | + | + | + | + |   |  |   | + | 40 | -821.988 | 1724.388 |
| + | + | + | + |   | + | + | + |   | + |   |   |  | + |   | 44 | -819.507 | 1727.511 |
| + | + | + | + | + |   |   | + | + | + |   |   |  | + |   | 44 | -826.011 | 1740.519 |
| + | + | + | + | + |   |   | + |   | + |   |   |  | + |   | 43 | -828.485 | 1743.445 |
| + | + | + | + | + | + | + |   |   | + |   |   |  | + |   | 46 | -828.292 | 1749.127 |
| + | + | + |   |   |   |   |   | + |   |   |   |  |   |   | 9  | -980.765 | 1979.554 |
| + |   | + |   |   |   |   |   |   |   |   |   |  |   |   | 7  | -983.648 | 1981.311 |
|   |   | + |   |   |   |   |   |   |   |   |   |  |   |   | 4  | -986.761 | 1981.527 |
|   |   | + | + |   |   |   |   |   |   |   |   |  |   |   | 5  | -986.412 | 1982.832 |
| + | + | + |   |   |   |   |   |   |   |   |   |  |   |   | 8  | -983.429 | 1982.875 |
| + | + | + |   |   | + |   |   | + |   |   |   |  |   |   | 12 | -980.326 | 1984.691 |
| + |   | + |   |   | + |   |   |   |   |   |   |  |   |   | 10 | -983.190 | 1986.407 |
| + | + | + |   |   | + |   |   |   |   |   |   |  |   |   | 11 | -982.953 | 1987.939 |
| + | + | + |   | + | + |   |   | + |   | + |   |  |   |   | 18 | -980.255 | 1996.595 |
| + |   |   | + |   |   |   |   |   |   |   |   |  |   |   | 10 | -1070.99 | 2162.016 |

|   |   |  |   |   |  |   |  |   |  |  |  |  |  |  |    |          |          |
|---|---|--|---|---|--|---|--|---|--|--|--|--|--|--|----|----------|----------|
|   |   |  | + |   |  |   |  |   |  |  |  |  |  |  | 7  | -1074.00 | 2162.022 |
| + | + |  | + |   |  |   |  |   |  |  |  |  |  |  | 11 | -1070.75 | 2163.535 |
| + | + |  | + | + |  |   |  |   |  |  |  |  |  |  | 14 | -1070.70 | 2169.460 |
| + | + |  | + |   |  |   |  | + |  |  |  |  |  |  | 15 | -1070.47 | 2170.996 |
|   | + |  | + |   |  |   |  | + |  |  |  |  |  |  | 12 | -1073.52 | 2171.074 |
| + | + |  | + | + |  |   |  | + |  |  |  |  |  |  | 18 | -1070.41 | 2176.913 |
| + | + |  | + |   |  | + |  |   |  |  |  |  |  |  | 23 | -1068.17 | 2182.488 |
| + | + |  | + |   |  | + |  | + |  |  |  |  |  |  | 27 | -1067.85 | 2189.882 |
| + | + |  | + | + |  | + |  | + |  |  |  |  |  |  | 30 | -1067.69 | 2195.610 |
| + |   |  |   |   |  |   |  |   |  |  |  |  |  |  | 6  | -1215.88 | 2443.767 |
|   | + |  |   |   |  |   |  |   |  |  |  |  |  |  | 4  | -1218.64 | 2445.277 |
| + | + |  |   |   |  |   |  |   |  |  |  |  |  |  | 7  | -1215.69 | 2445.401 |
| + | + |  |   | + |  |   |  |   |  |  |  |  |  |  | 10 | -1215.62 | 2451.277 |

162

163

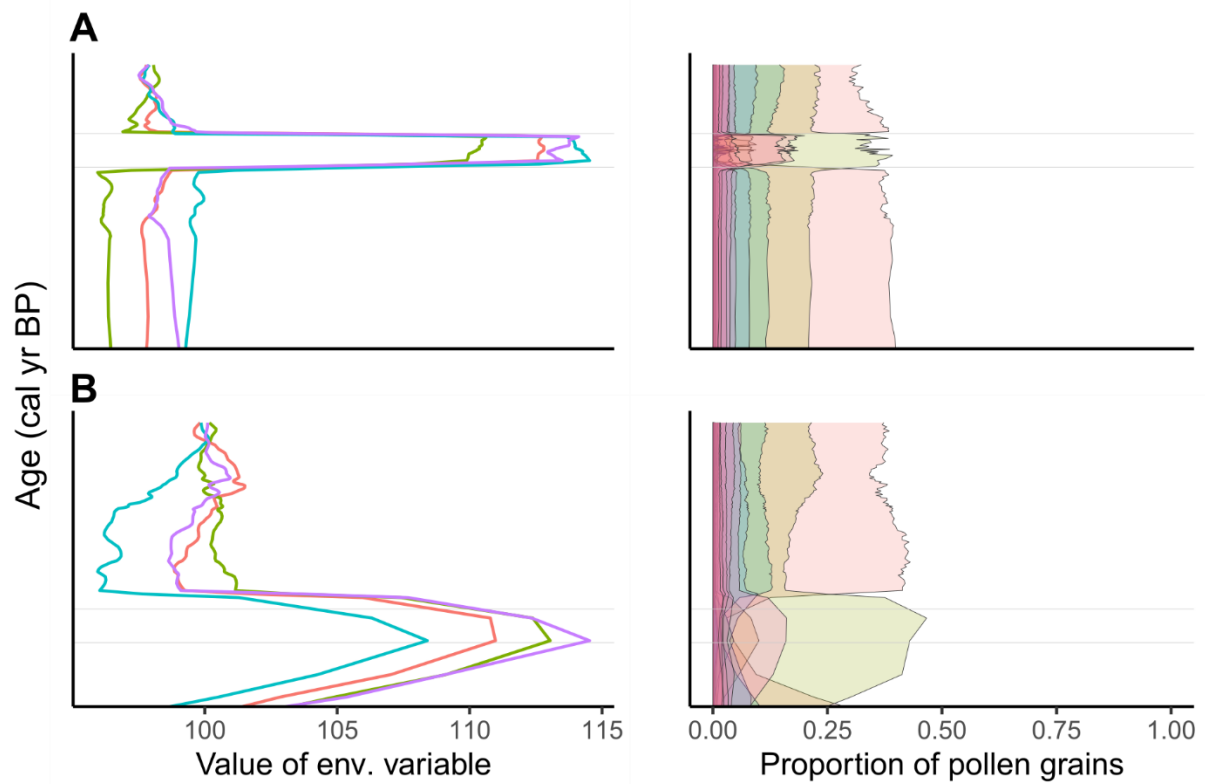

164

165 **Figure S1. Example of the manipulation of environmental variables and simulated pollen taxa in a**  
 166 *recent* (A; 2000–3000 cal yr BP) and *late* (B; 5500–6500 cal yr BP) time period, i.e. ‘focal area’. Note  
 167 that the *late focal area* has a low density of levels and the *recent focal area* has a high density of levels.

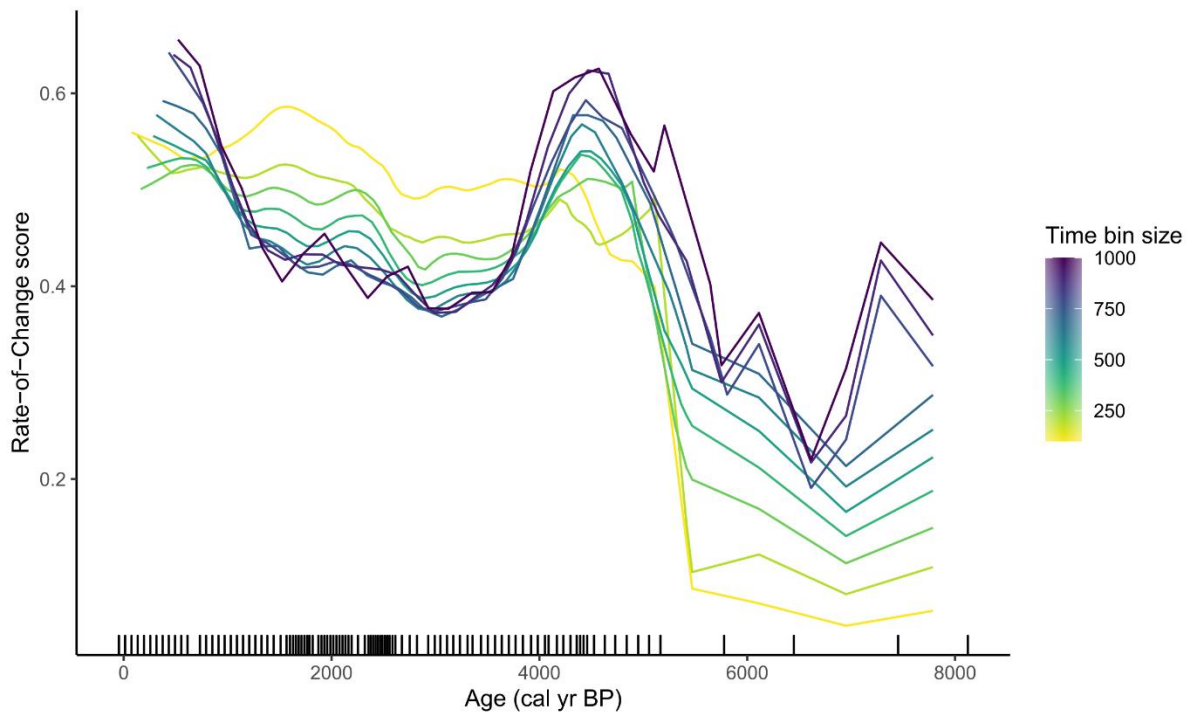

169

170 **Figure S2. Rate-of-change score in Sequence A (Glendalough) calculated with various size of time**  
171 **bins using binning with moving window method.** Age-weighted average and Chi-squared coefficient  
172 were selected for smoothing and dissimilarity. Black ticks at the y-axis indicates the position of  
173 stratigraphical levels.

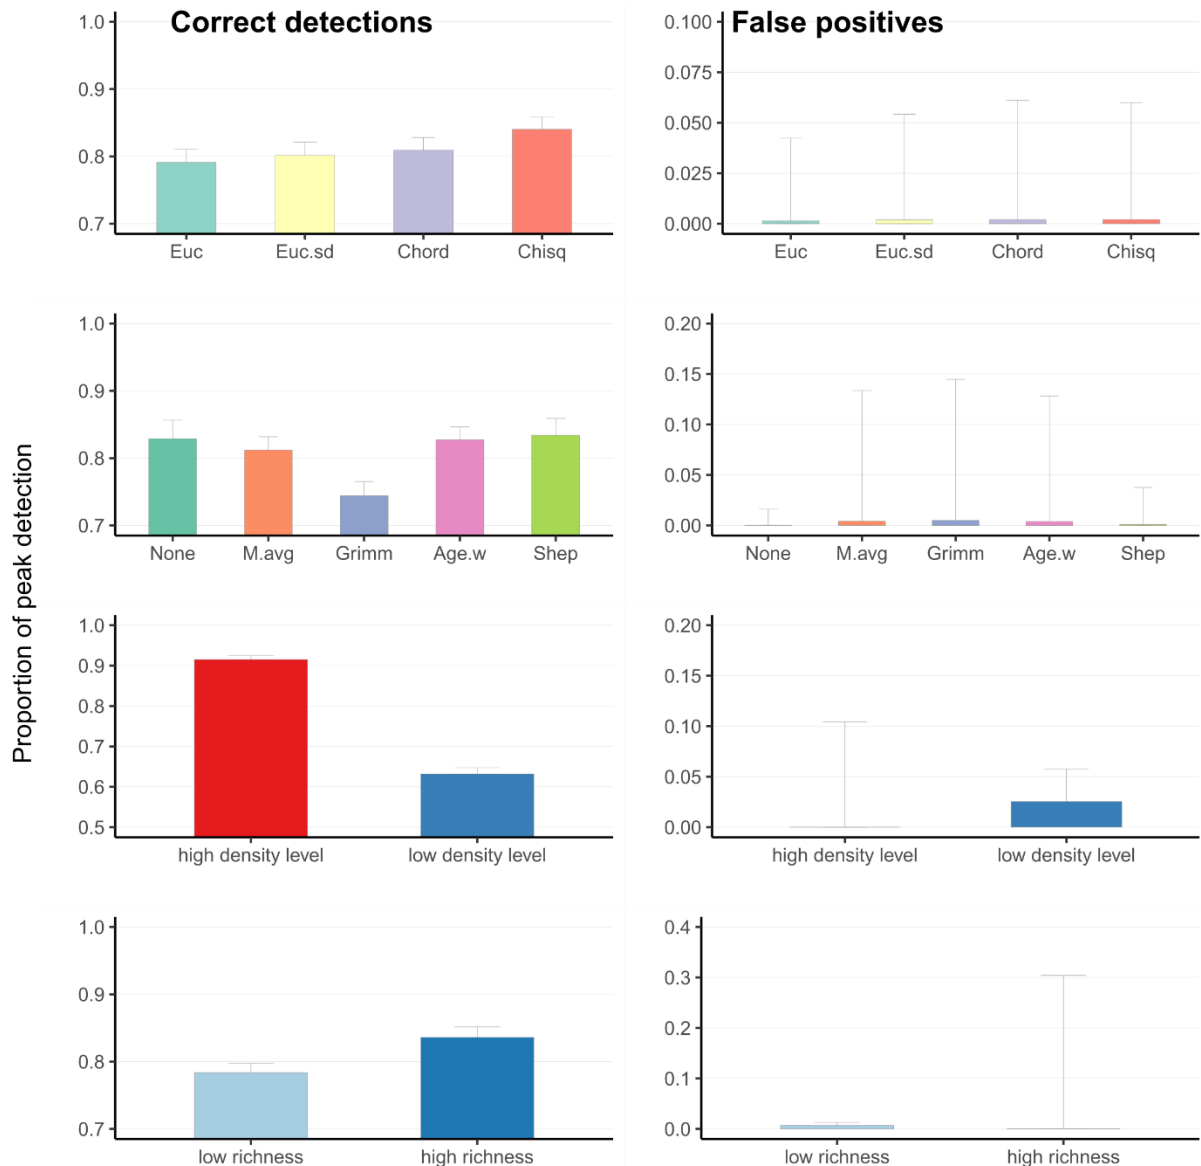

174

175 **Figure S3. Comparison of estimated marginal means and 95% quantile of peak-point detection in**  
 176 **the simulated datasets.** Dissimilarity coefficient: Euc = Euclidian distance, Euc.sd = Standardised  
 177 Euclidean distance, Chord = Chord distance, Chisq = Chi-squared coefficient. Smoothing of pollen data:  
 178 None = data without smoothing, M.avg = moving average, Grimm = Grimm's smoothing, Age.w = age-  
 179 weighted average, Shep = Shepard's 5-term filter.

180

181 [Supplementary references](#)

182 Birks, H. J. B., & Gordon, A. D. (1985). *Numerical Methods in Quaternary Pollen Analysis*. Academic  
183 Press, London.

184 Davis, J. C. (1986). *Statistics and Data Analysis in Geology* (2nd edn.). J. Wiley & Sons, New York.

185 Grimm, E. C., & Jacobson, G. L. (1992). Fossil-pollen evidence for abrupt climate changes during the  
186 past 18000 years in eastern North America. *Climate Dynamics*, 6, 179–184.

187 Kelly, R. F., Higuera, P. E., Barrett, C. M., & Feng Sheng, H. (2011). A signal-to-noise index to quantify  
188 the potential for peak detection in sediment-charcoal records. *Quaternary Research*, 75(1), 11–  
189 17. doi:10.1016/j.yqres.2010.07.011

190 Prentice, I. C. (1980). Multidimensional scaling as a research tool in Quaternary palynology: A review  
191 of theory and methods. *Review of Palaeobotany and Palynology*, 31, 71–104. doi:10.1016/0034-  
192 6667(80)90023-8

193 Wilkinson, L. (2005). *The Grammar of Graphics*. Springer-Verlag, New York, USA. doi: 10.1007/0-387-  
194 28695-0

195
